# Supplementary material for: CRISPR-Cas Controls Cryptic Prophages
Source: MDPI journal article supplement (doi:10.3390/ijms232416195), 2022-12-19
Supplement: s1 [file s1]

## Supporting Information

**Sooyeon Song<sup>1,2,3\*</sup>, Ekaterina Semenova<sup>4</sup>, Konstantin Severinov<sup>4</sup>, Laura Fernández-García<sup>1</sup>, Michael J. Benedik<sup>5</sup>, Toshinari Maeda<sup>6</sup>, and Thomas K. Wood<sup>1\*</sup>**

<sup>1</sup>Department of Chemical Engineering, Pennsylvania State University,  
University Park, Pennsylvania, 16802-4400, USA

Departments of Animal Science<sup>2</sup> and Agricultural Convergence Technology<sup>3</sup>, Jeonbuk National  
University, 587 Baekje-Daero, Deogjin-Gu, Jeonju-Si, Jellabuk-Do, 54896, South Korea

<sup>4</sup>Waksman Institute of Microbiology, Rutgers, The State University of New Jersey, Piscataway, NJ 08854

<sup>5</sup>Hamad bin Khalifa University, Education City, Doha, Qatar

<sup>6</sup>Department of Biological Functions Engineering, Kyushu Institute of Technology, Kitakyushu, Japan  
808-0196

\*For correspondence. E-mail [songsy@jbnu.ac.kr](mailto:songsy@jbnu.ac.kr), [tuw14@psu.edu](mailto:tuw14@psu.edu)

Tel. (+)1 814-863-4811; Fax (1) 814-865-7846

**Table S1. Inactivating CRISPR-Cas eliminates persister cell resuscitation on glucose agarose gel pads.** Single persister cells were observed using light microscopy (Zeiss Axio Scope.A1). The total number and waking number of persister cells are shown after 6 hours on 0.4 wt% glucose minimal medium. Fold-change in waking is relative to BW25113. These results are the combined observations from two independent experiments (independent culture results separated by “/”), and standard deviations are shown. Sample microscope images are shown in **Fig. 1**.

|                 | <b>Total<br/>cells</b> | <b>Waking<br/>cells</b> | <b>% waking</b> | <b>Fold-<br/>change</b> |
|-----------------|------------------------|-------------------------|-----------------|-------------------------|
| BW25113         | 504/382                | 199/248                 | 52 ± 18         | 1                       |
| $\Delta cas2$   | 516/677                | 6/15                    | 1.7 ± 0.7       | -30.9                   |
| $\Delta spacer$ | 323/174                | 10/7                    | 3.6 ± 0.7       | -14.6                   |

**Table S2. Inactivating CRISPR-Cas causes cell death and ghost cell formation.** For resuscitated cells, persister cells were washed with PBS twice, resuscitated by M9 0.4% glucose for 10 min and stained with LIVE/DEAD reagents. Exponential cells were grown to a turbidity of 0.8 (at 600 nm) and stationary cells were grown to turbidity of 2.0. The ghost cells in the persister population were visualized using a Zeiss Axioscope.A1 microscope. The results are the combined observations from two independent experiments (independent culture results separated by “/”). The microscope images are shown in **Fig. 1AB** and **Fig. S6**.

|                     | Strains                | Total cells   | Dead cells | Ghost cells | % Ghost cells | fold-change ghost cells | % dead | fold-change dead cells |
|---------------------|------------------------|---------------|------------|-------------|---------------|-------------------------|--------|------------------------|
| <b>Resuscitated</b> | <b>BW25113</b>         | 52/115        | 2/7        | 0/1         | 0.6           | 1                       | 5.4    | 1                      |
|                     | $\Delta cas2$          | 142/106       | 54/38      | 38/13       | 20.6          | 34                      | 37.1   | 6.9                    |
|                     | $\Delta spacer$        | 161/221       | 76/76      | -           | -             | -                       | 37.8   | 7.0                    |
| <b>Exponential</b>  | <b>BW25113</b>         | 153/147       | 0/2        | -           | -             | -                       | 0.7    | 1                      |
|                     | $\Delta cas2$          | 59/40         | 1/2        | -           | -             | -                       | 3.4    | 4.9                    |
|                     | $\Delta spacer$        | 95/146        | 1/5        | -           | -             | -                       | 2.1    | 3.15                   |
| <b>Stationary</b>   | <b>BW25113</b>         | 492/123       | 1/0        | -           | -             | -                       | 0.1    | 1                      |
|                     | $\Delta cas2$          | 1136/173<br>6 | 14/18      | -           | -             | -                       | 1.13   | 11.2                   |
|                     | $\Delta spacer$        | 200/113       | 19/8       | -           | -             | -                       | 8.26   | 81.3                   |
|                     | $\Delta casE$          | 208/175       | 9/10       | -           | -             | -                       | 5.02   | 49.4                   |
|                     | $\Delta 9 \Delta cas2$ | 833/1541      | 10/13      | -           | -             | -                       | 1.02   |                        |
|                     | $\Delta spacer3$       | 136/297       | 8/73       | -           | -             | -                       | 15.23  |                        |
|                     | $\Delta spacer12$      | 513/396       | 213/92     | -           | -             | -                       | 32.38  |                        |

**Table S3. CRISPR-Cas does not affect cryptic prophage excision in stationary cells but produces the CRISPR array. (A)** Fold changes in excision are relative to the wild-type strain as determined by qPCR. **(B)** Fold changes in the CRISPR array are relative to the wild-type strain as determined by qRT-PCR (the  $\Delta$ spacer strain was used as a negative control). Cycle numbers ( $C_t$ ) are indicated for each sample including that for the target genes as well as that of the house-keeping gene, *purM*, which was used to normalize the data. *cas2* served to inactivate crRNA production due to a polar mutation. Fold changes in the transcription of various targets (i.e., cryptic prophage CP4-57, e14, DLP-12, Spacer3, and Spacer12) with and without *cas2*<sup>+</sup> (*cas2*<sup>+</sup>/*cas2*<sup>-</sup>) were calculated as described earlier [42]:

$$2^{-(C_{t \text{ target\_cas2}^+} - C_{t \text{ purM\_cas2}^+})} / 2^{-(C_{t \text{ target\_cas2}^-} - C_{t \text{ purM\_cas2}^-})}$$

**(A) qPCR**

| Gene               | <i>purM</i>    |                | CP4-57          |                 | e14             |                 | DLP-12          |                 |
|--------------------|----------------|----------------|-----------------|-----------------|-----------------|-----------------|-----------------|-----------------|
| Strain             | WT             | <i>cas2</i>    | WT              | <i>cas2</i>     | WT              | <i>cas2</i>     | WT              | <i>cas2</i>     |
| $C_T$              | 9.30<br>± 0.13 | 9.70<br>± 0.18 | 30.45<br>± 1.73 | 30.37<br>± 0.68 | 16.30<br>± 0.06 | 17.45<br>± 0.51 | 30.58<br>± 0.49 | 30.05<br>± 0.5  |
| $\Delta C_T$       |                |                | 21.16<br>± 1.73 | 20.67<br>± 0.70 | 7.00<br>± 0.15  | 8.16<br>± 0.54  | 21.29<br>± 0.51 | 20.35<br>± 0.53 |
| $\Delta\Delta C_T$ |                |                |                 | -0.48<br>± 0.7  |                 | 1.16<br>± 0.54  |                 | -0.94<br>± 0.53 |
| fold               |                |                |                 | 1.40            |                 | -2.23           |                 | 1.92            |

**(B) qRT-PCR**

| Gene               | <i>purM</i>   |               |               | Spacer3         |                 |        | Spacer12        |                 |        |
|--------------------|---------------|---------------|---------------|-----------------|-----------------|--------|-----------------|-----------------|--------|
| Strain             | WT            | <i>cas2</i>   | spacer        | WT              | <i>cas2</i>     | spacer | WT              | <i>cas2</i>     | spacer |
| $C_T$              | 25.3<br>± 0.5 | 22.2<br>± 0.5 | 22.0<br>± 0.2 | 30.68<br>± 1.73 | 24.35<br>± 0.93 | -      | 33.60<br>± 1.20 | 27.12<br>± 1.22 | -      |
| $\Delta C_T$       |               |               |               | 5.37<br>± 1.08  | 2.19<br>± 1.1   | -      | 8.28<br>± 1.31  | 4.96<br>± 1.32  | -      |
| $\Delta\Delta C_T$ |               |               |               |                 | -3.20<br>± 1.51 | -      |                 | -3.33<br>± 1.86 | -      |
| fold               |               |               |               |                 | 9.11            | -∞     |                 | 10.02           | -∞     |

**Table S4. *E. coli* bacterial strains and plasmids utilized.**

| Strains and Plasmids                            | Features                                                                                    | Source    |
|-------------------------------------------------|---------------------------------------------------------------------------------------------|-----------|
| <b>Strains</b>                                  |                                                                                             |           |
| BW25113                                         | <i>rrnB3 ΔlacZ4787 hsdR514 Δ(araBAD)567 Δ(rhaBAD)568 rph-1</i>                              | [43]      |
| BW25113 <i>Δcas1</i>                            | <i>Δcas1</i> , ΩKm <sup>R</sup>                                                             | [43]      |
| BW25113 <i>Δcas2</i>                            | <i>Δcas2</i> , ΩKm <sup>R</sup>                                                             | [43]      |
| BW25113 <i>Δcas2</i> ΔKm <sup>R</sup>           | <i>Δcas2</i> , ΔKm <sup>R</sup>                                                             | this work |
| BW25113 <i>Δcas3</i>                            | <i>Δcas3</i> , ΩKm <sup>R</sup>                                                             | [43]      |
| BW25113 <i>ΔcasA</i>                            | <i>ΔcasA</i> , ΩKm <sup>R</sup>                                                             | [43]      |
| BW25113 <i>ΔcasB</i>                            | <i>ΔcasB</i> , ΩKm <sup>R</sup>                                                             | [43]      |
| BW25113 <i>ΔcasC</i>                            | <i>ΔcasC</i> , ΩMr                                                                          | [43]      |
| BW25113 <i>ΔcasD</i>                            | <i>ΔcasD</i> , ΩKm <sup>R</sup>                                                             | [43]      |
| BW25113 <i>ΔcasE</i>                            | <i>ΔcasE</i> , ΩKm <sup>R</sup>                                                             | [43]      |
| BW25113 <i>Δspacer</i><br>(also called BW39292) | Δ(13 spacer region), ΩKm <sup>R</sup>                                                       | [11]      |
| BW40114                                         | <i>placuv5::cas3 paraB8p::casABCDE12spacers</i>                                             | [44]      |
| BW25113 <i>Δspacer3</i>                         | Δ(spacer region 3), ΔKm <sup>R</sup>                                                        | this work |
| BW25113 <i>Δspacer12</i>                        | Δ(spacer region 12), ΔKm <sup>R</sup>                                                       | this work |
| BW40114                                         | BW25113 <i>lacUV5::cas3 araB8p::casABCDE12</i>                                              | [44]      |
| BW15113 Δ9                                      | BW15113 lacking all 9 cryptic prophages                                                     | [13]      |
| BW15113 Δ9 <i>cas2</i>                          | BW15113 Δ9 <i>cas2</i> , ΔKm <sup>R</sup>                                                   | this work |
| <i>ssrA</i>                                     | <i>ssrA</i> , ΩKm <sup>R</sup>                                                              | [45]      |
| <b>Plasmids</b>                                 |                                                                                             |           |
| pCA24N                                          | Cm <sup>R</sup> ; <i>lacI<sup>q</sup></i>                                                   | [39]      |
| pCA24N_ <i>cas2</i>                             | Cm <sup>R</sup> ; <i>lacI<sup>q</sup></i> , P <sub>T5-lac</sub> :: <i>cas2</i> <sup>+</sup> | [39]      |
| pKD4                                            | FRT::Kan <sup>R</sup> ::FRT, Amp <sup>R</sup>                                               | [40]      |
| pCP20                                           | FLP synthase, Amp <sup>R</sup>                                                              | [40]      |

**Table S5. Primers used in this study for qRT-PCR and qPCR.** \* indicates excision primers.

| Gene                 | Sequence (5' to 3')                                                                                                                                              |
|----------------------|------------------------------------------------------------------------------------------------------------------------------------------------------------------|
| <b>qRT-PCR</b>       |                                                                                                                                                                  |
| <i>purM</i>          | F: CGGTGTTGATATTGACGCGGG<br>R: CAGCACGGGTTTCACGATATTTTG                                                                                                          |
| <i>ydfD</i> (Qin)    | F: TCAGCATTTGTGCTTGTCTG<br>R: CTGCCGGGATTTTCGATATTA                                                                                                              |
| <i>hokD</i> (Qin)    | F: GCCCTGATCGTCATCTGTTT<br>R: AGCTGTGAAGACAGCGACCT                                                                                                               |
| <i>ypjF</i> (CP4-57) | F: TATGGCCTGACACTGAACGA<br>R: GTTGTGTCACGAAAATCCT                                                                                                                |
| <i>rzoD</i> (DLP-12) | F: TGCTCTGCGTGATGATGTTG<br>R: TCTCTCTGAGGGTGAAATAATCC                                                                                                            |
| <i>essD</i> (DLP-12) | F: CTCACAGTGGGCAGCAATAG<br>R: TATTCACCTCTCGCAGCCTT                                                                                                               |
| <i>Spacer3</i>       | F: GATAAACCCTTTTCGCAGAC<br>R: AGAAATTCCAGACCCGATCC                                                                                                               |
| <i>Spacer12</i>      | F: AACGCCTGAACCGAGAGTT<br>R: CTGGGAGTTCTACCGCAGAG                                                                                                                |
| <b>qPCR</b>          |                                                                                                                                                                  |
| *CP4-57              | F: AAGCATGTAGTACCGAGGATGTAGG<br>R: TATGTCTCCTCACCGTCTGGTCGG                                                                                                      |
| *e14                 | F: GTGCAAACATCGGTGACGAA<br>R: TTCAGCAGCTTAGCGCCTTC                                                                                                               |
| *DLP-12              | F: CAAAAGCCATTGACTCAGCAAGG<br>R: CGGATAAGACGGGCATAAATGA                                                                                                          |
| <i>purM</i> 400      | F: CTGATTGCACTCGGTTCCAG<br>R: CGTTTTACCGTTGGCATTG                                                                                                                |
| Spacer 3-1           | F: CATGCAATTACAACATCAGGGTA<br>R: GCCATTGGTAAAACCTTCCA                                                                                                            |
| Spacer 3-2           | F: AAATTCCGAAAAAGCTCCTGA<br>R: TGCTTTCAAGATTATGGCGTA                                                                                                             |
| Spacer 6             | F: CACGAAAGCCAGCCTATTCC<br>R: CCGCTGTTTCTTTCTCCAGG                                                                                                               |
| Spacer 8             | F: GCCAGCATAATGAGATCGGC<br>R: TTTTACCCAAACTCAGCGCG                                                                                                               |
| Spacer 11            | F: TGTGCAGTTGTACCAGTGGA<br>R: CAACCCAGCAAAGTTTCGGA                                                                                                               |
| Spacer 12-1          | F: TGTATGTGCCCCGGTGTTAT<br>R: GCAGATGAAGGCGCATTACA                                                                                                               |
| Spacer 12-2          | F: AGCTTTACACCTCGGCTCAT<br>R: CCGGAACTCTTGTGTTGGTG                                                                                                               |
| Spacer 12-3          | F: TCTACAGGGAAAGGACGACC<br>R: CTCTGCAACCAAAGTGAACCA                                                                                                              |
| Spacer 13            | F: ACAACCACTATCGCCCCTTT<br>R: GGTAAGGCTGCATTGGGAAG                                                                                                               |
| <b>Deletions</b>     |                                                                                                                                                                  |
| <i>cas2</i>          | F: ACCTTAATGTAAACATTTTCCTTATTATTAAAGATCAGCTAATTCTTTGTTTGT<br>GTAGGCTGGAGCTGCTTC<br>R: CATTCCGCTTCCTGTTTCACTGGGAGATGCAGGCCATCGGAGTAGCTGA<br>ACATATGAATATCCTCCTTAG |
| Spacer 3             | F: GCTGGCGCGGGAACTCGCGACCGCTCAGAAATTCCAGACCCGATCCAA<br>AGTGTAGGCTGGAGCTGCTTC<br>R: AAAGGTGATGCCGAACACGCTGAGTTCCCCGCGCCAGCGGGGATAAACC<br>GCATATGAATATCCTCCTTAG    |

Spacer 12      **F:** CAGAGGCGGGGGAAGTCCAAGTGATATCCATCATCGCATCCAGTGCGCC  
                         CGTGTAGGCTGGAGCTGCTTC  
                         **R:** GGTTTGCAACGCCTGAACCGAGAGTTCCCCGCGCCAGCAGGGATAAACC  
                         GCATATGAATATCCTCCTTAG

**Verification for *cas2* and Spacer**

***cas2***            **F:** GAAAATGTACCTCCGCGCTT  
                         **R:** CCATCCAAATCTACCGGGGT

**Spacer**          **F:** GGATCGGGTCTGGAATTTCT  
                         **R:** GGGGAACTCGTAGTCCATCA

---

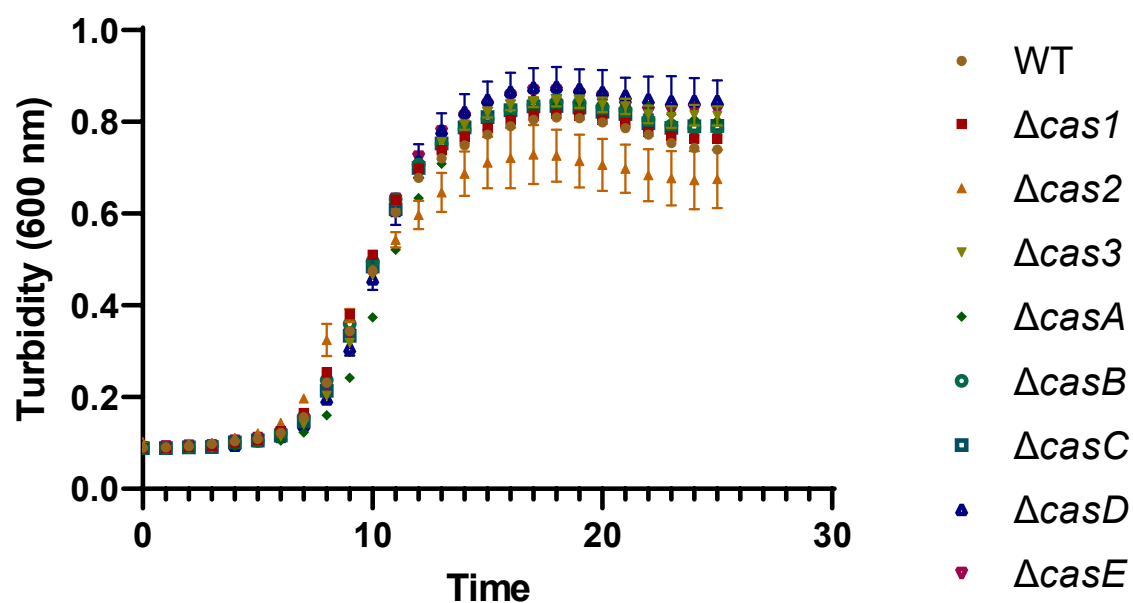



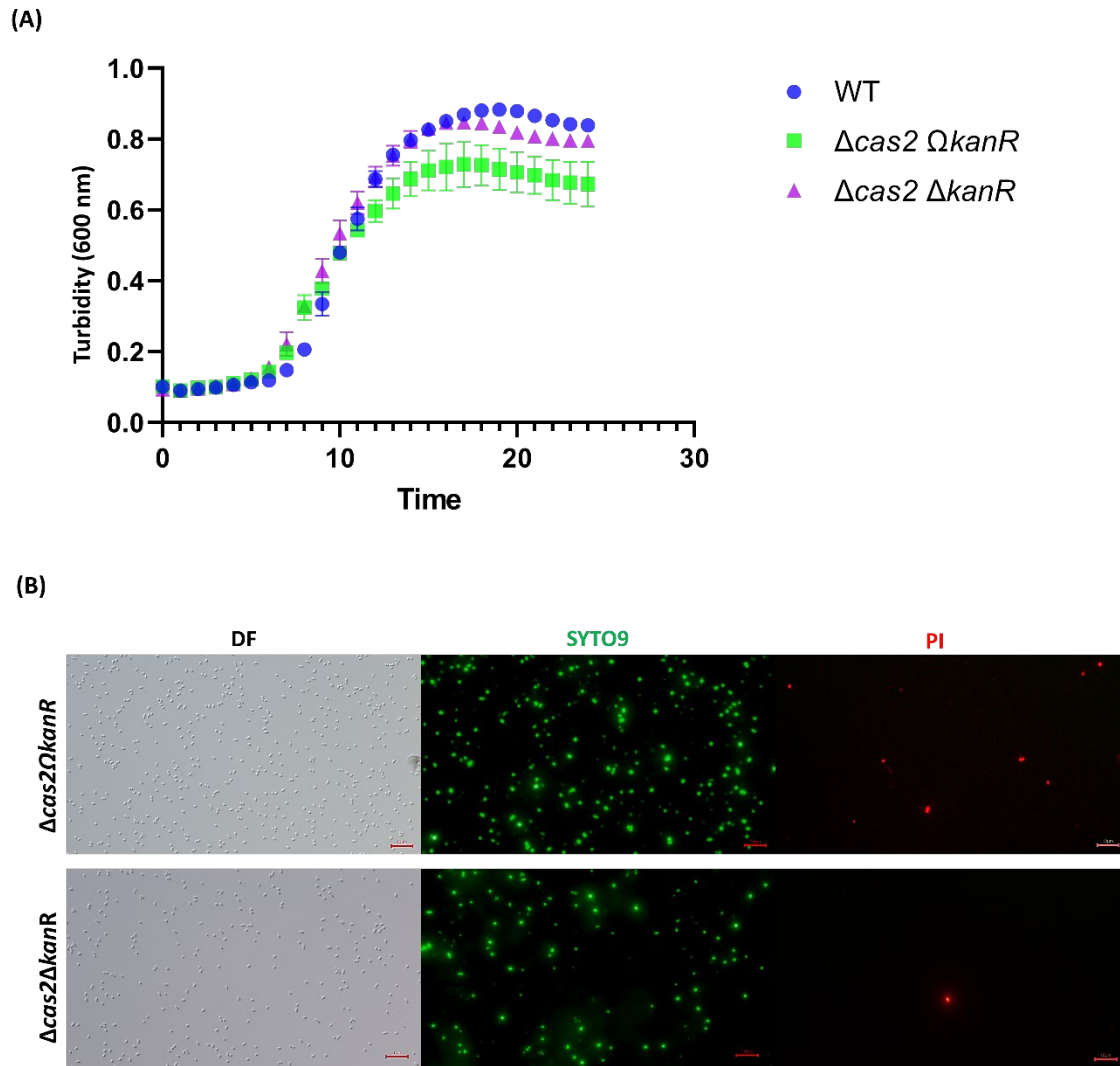

**Supplementary Figure S2.** Removing the kanamycin marker from the *E. coli*  $\Delta cas2 \Omega kan^R$  strain to create the  $\Delta cas2 \Delta kan^R$  strain (A) increased growth in M9 glucose medium at 37°C (turbidity at 600 nm shown and error bars indicate standard deviations from two independent cultures) and (B) reduced toxicity via the LIVE/DEAD assay for stationary cells showing the polar mutation due to the kanamycin marker in the  $\Delta cas2 \Omega kan^R$  strain inhibits spacer formation, which results in reduced growth and increased toxicity. Representative images shown from two independent cultures.

### BW25113

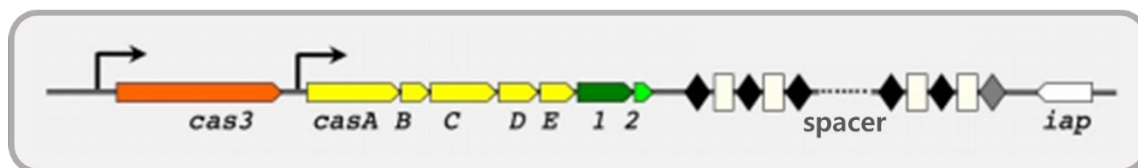

### $\Delta cas2$

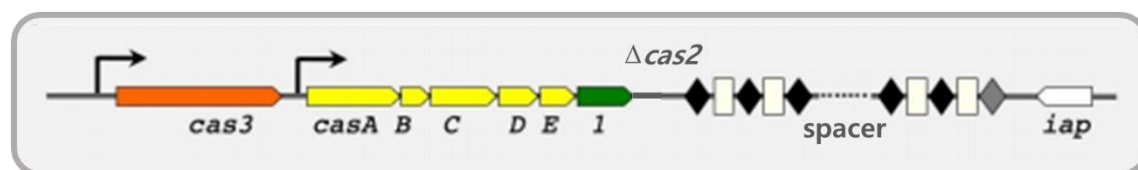

### $\Delta spacer$

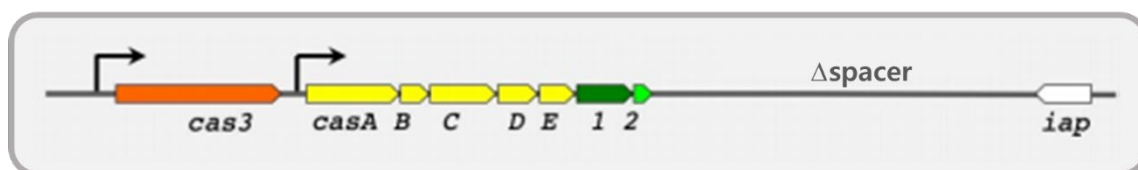

### BW40114

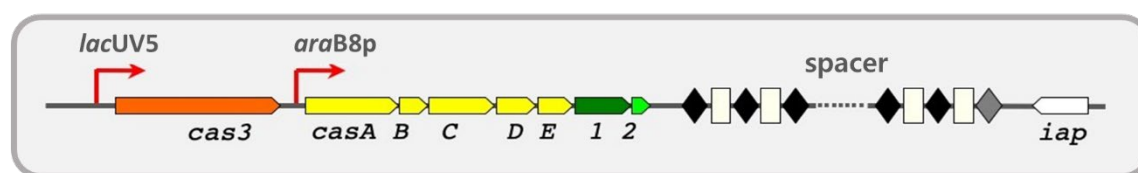

**Supplementary Figure S3. Schematics of the CRISPR-Cas strains used in this study.** All the strains are derivatives of isogenic host, BW25113 (see Table S4).

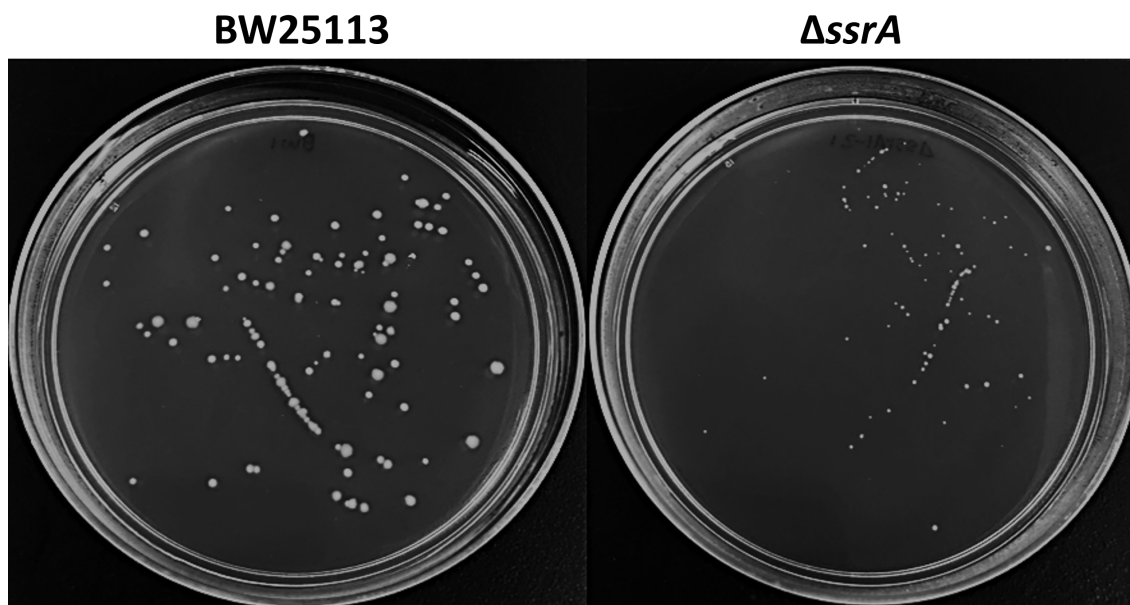

**Supplementary Figure S4.** As a control for growth rate and resuscitation, the *ssrA* mutation was checked and found to have no effect on persister resuscitation on LB plates although it grows 22% more slowly than the wild-type strain ( $1.18 \pm 0.07/\text{h}$  vs.  $1.49 \pm 0.03/\text{h}$ , respectively). The number of *ssrA* persisters that resuscitated is  $101 \pm 2$  vs.  $100.0 \pm 0.1$  for the wild-type. Plates were incubated for 24 h at 37°C, and representative images shown from two independent cultures.

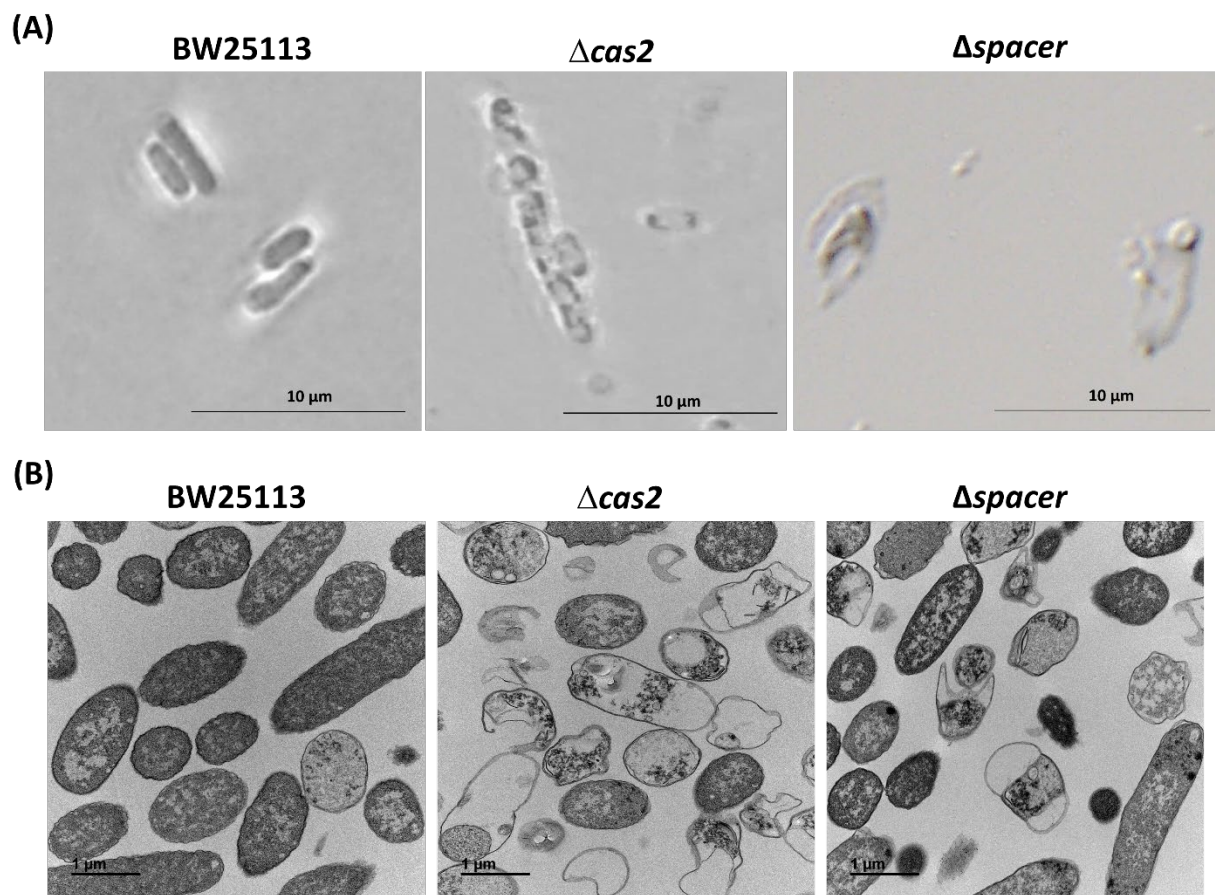

**Supplementary Figure S5. CRISPR-Cas prevents cell lysis induced by cryptic phages. (A)** Single cell persister waking of BW25113  $\Delta cas2$  and the  $\Delta spacer$  mutant on M9 0.4% glucose agar plates incubated at 37°C for 4 hours. The scale bar indicates 10 $\mu$ m. **(B)** TEM image for persister waking of BW25113  $\Delta cas2$  and the  $\Delta spacer$  mutant. Persister cells were resuscitated by M9 0.4% glucose for 10 min. One representative image from two independent cultures is shown. The scale bar indicates 1  $\mu$ m.

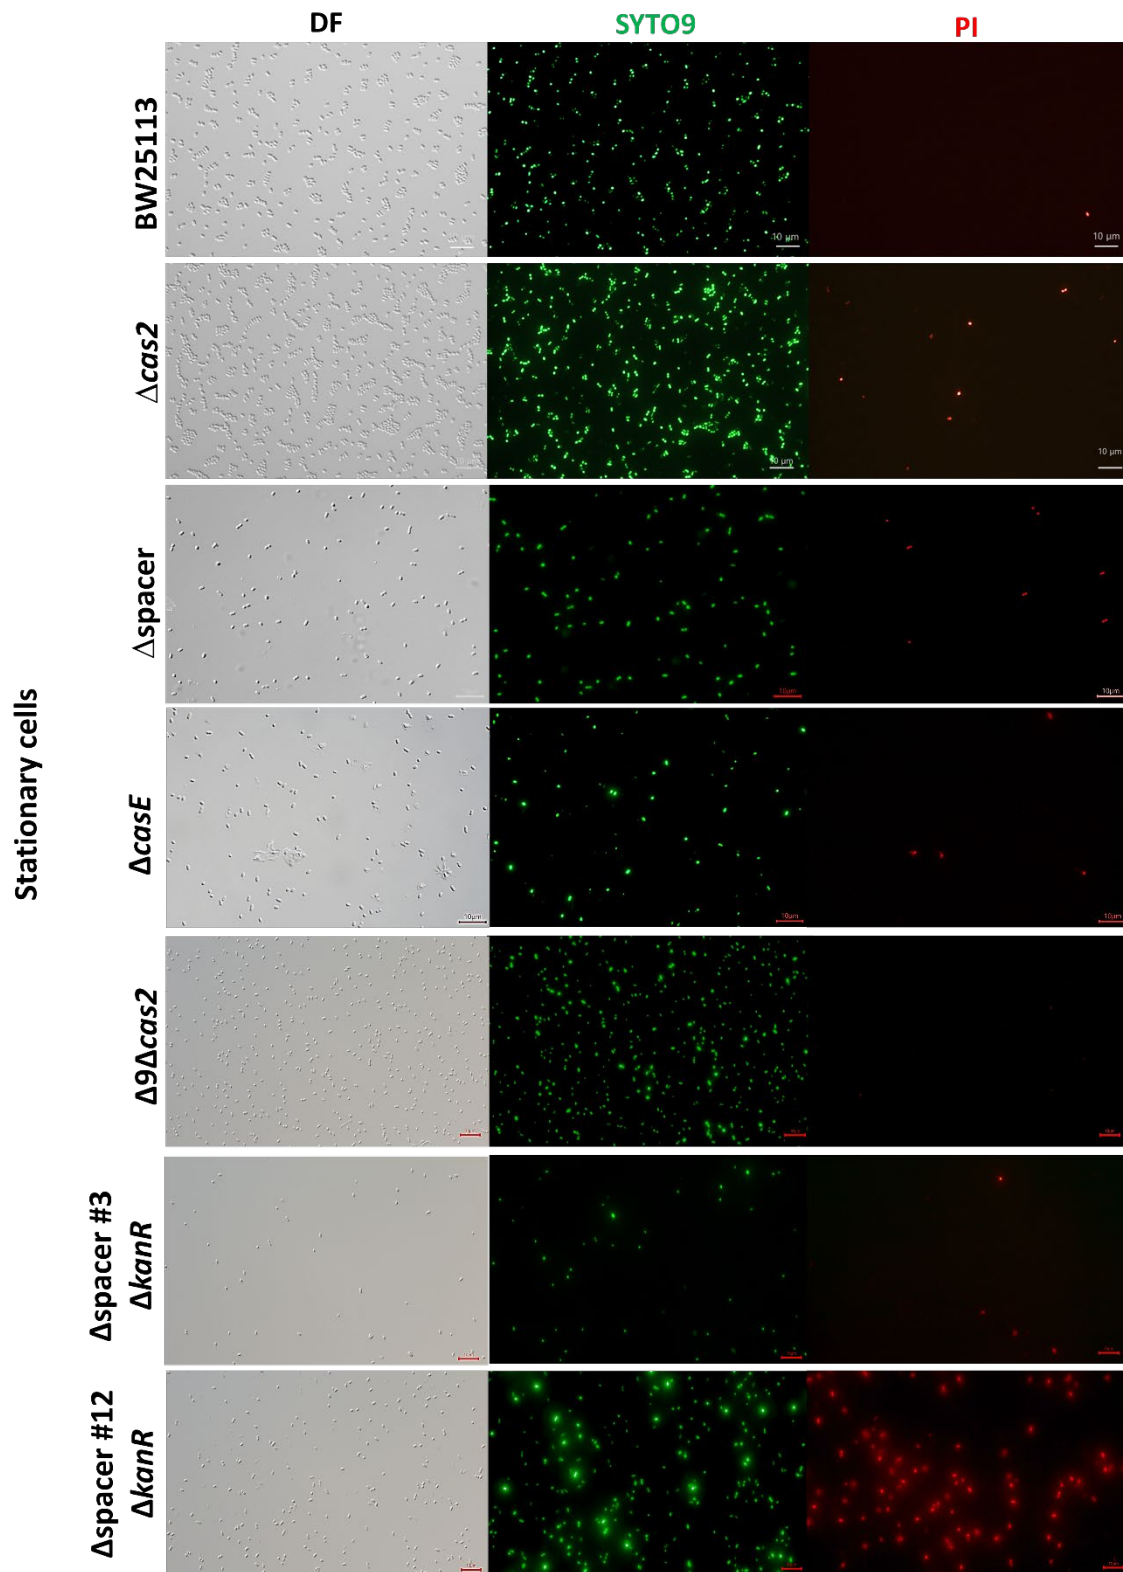

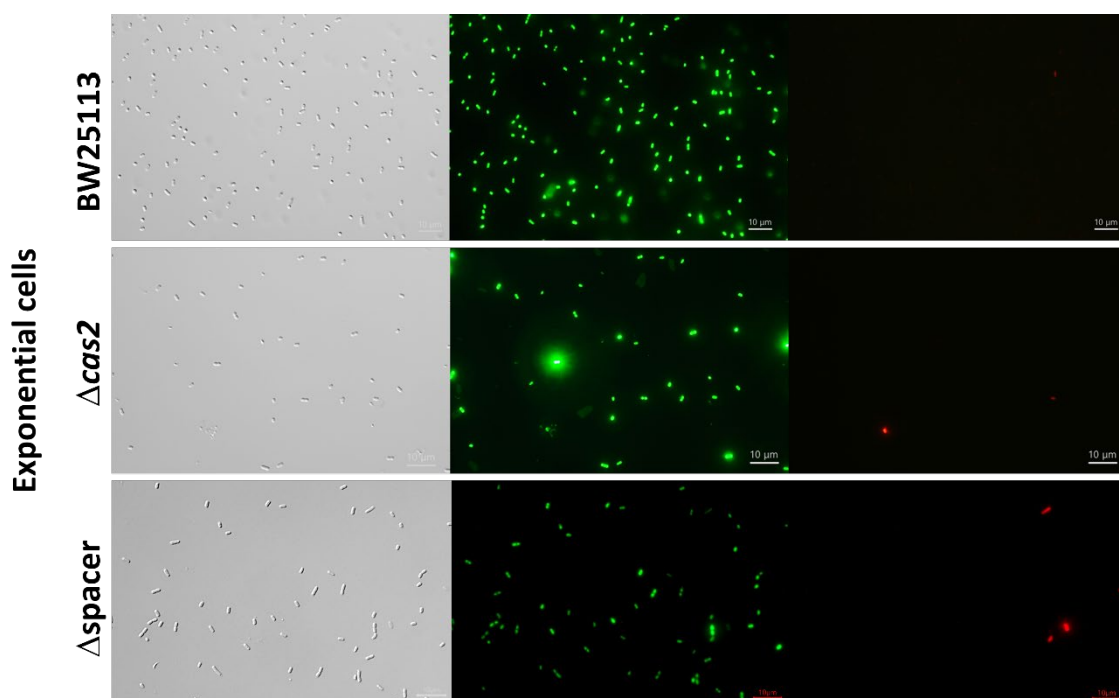

**Supplementary Figure S6.** LIVE/DEAD staining of stationary (turbidity 2.0) and exponential (turbidity 0.8) cells shows the *cas2*,  $\Delta$ spacer (all 13 spacers removed), and mutations cause cell death. DF is dark field, SYTO9 is a membrane permeable stain for nucleic acids (green), and PI is propidium iodide, which is a membrane impermeable stain for the nucleic acids of dead cells (red). Tabulated cell numbers are shown in **Table S2**, and representative images from two independent cultures shown.

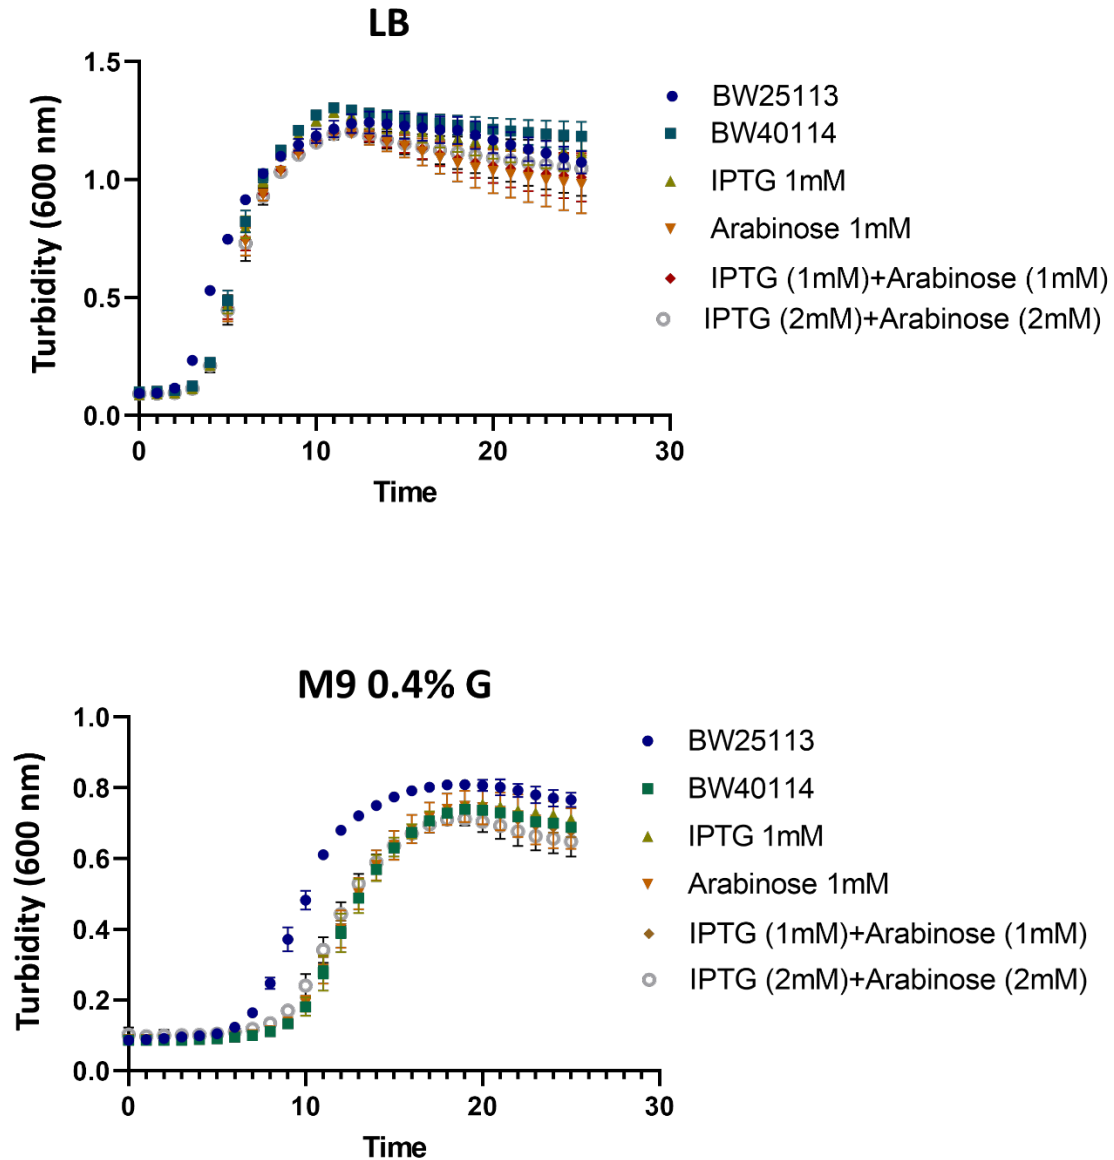

**Supplementary Figure S7.** Growth curves upon inducing the full CRISPR-Cas system in *E. coli* BW40114 (via IPTG and arabinose) at 37°C in LB and M9 glucose media (turbidity at 600 nm shown). The growth is reduced due to the metabolic burden of producing the complete CRISPR-Cas system. Error bars indicate standard deviations from two independent cultures.









**Supplementary Figure S8.** Predicted base-pairing interactions between each of the CRISPR spacers (i.e., spacers 8, 11, 12, and 13) and a protospacer within the cryptic phage mRNA (CPS-53, CP4-6, Rac, Qin, CP4-57, DLP-12, and e14). Note, some spacers match more than one region within a particular cryptic prophage. The complementary nt between the spacers and cryptic prophage protospacers is indicated by yellow highlight and vertical lines. Note that the spacer sequences are written 3' to 5' to aid an understanding of the putative RNAi matching.

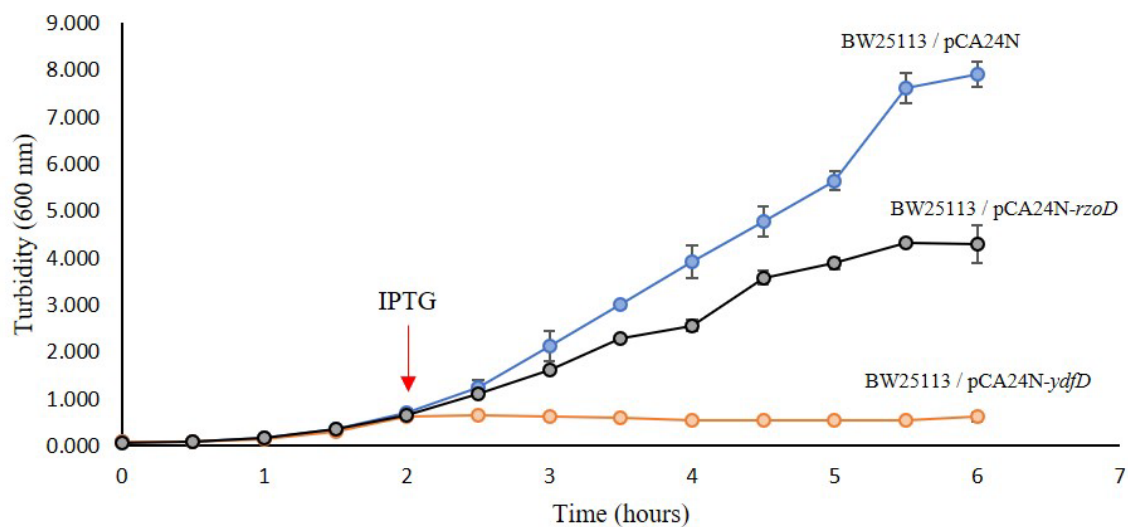

**Supplementary Figure S9. Toxicity of YdfD and RzoD.** Growth curve at 37°C in LB (turbidity at 600 nm shown) of *E. coli* BW25113 harboring empty plasmid pCA24N (blue line), plasmid pCA24N encoding *ydfD* (orange line), and encoding plasmid pCA24N encoding for *rzoD*. Red arrow indicates addition of 1 mM of IPTG produce the toxins. Average of two independent cultures shown, and error bars indicate standard deviations.

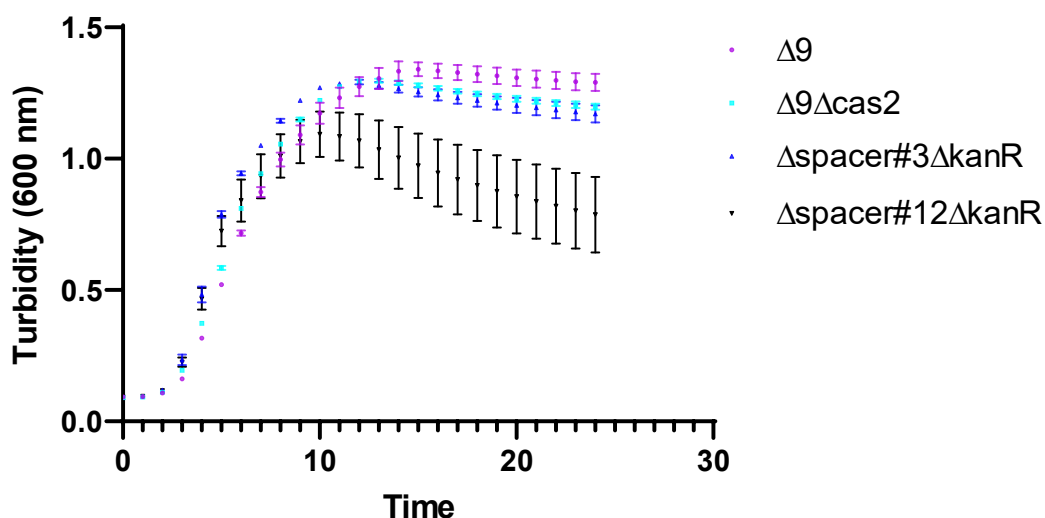

**Supplementary Figure S10.** Deleting the DNA encoding spacer #12, which encodes crRNA targeting four separate regions in cryptic prophage mRNA (mRNA of Rac, Qin, CP4-57, and DLP-12), leads to lower cell yield. As seen **Table S2** and **Fig. S6**, this is associated with increased cell lysis. In contrast, deleting *cas2* in  $\Delta 9$  and deleting spacer 3, which encodes crRNA that lacks matches in the mRNA of all 9 cryptic prophages has little effect on growth and cell lysis.  $\Delta 9$  is BW25113 that lacks all cryptic prophages and Kan<sup>R</sup> is kanamycin resistance. Growth (turbidity at 600 nm) at 37°C in LB shown, and error bars indicate standard deviations from two independent cultures.

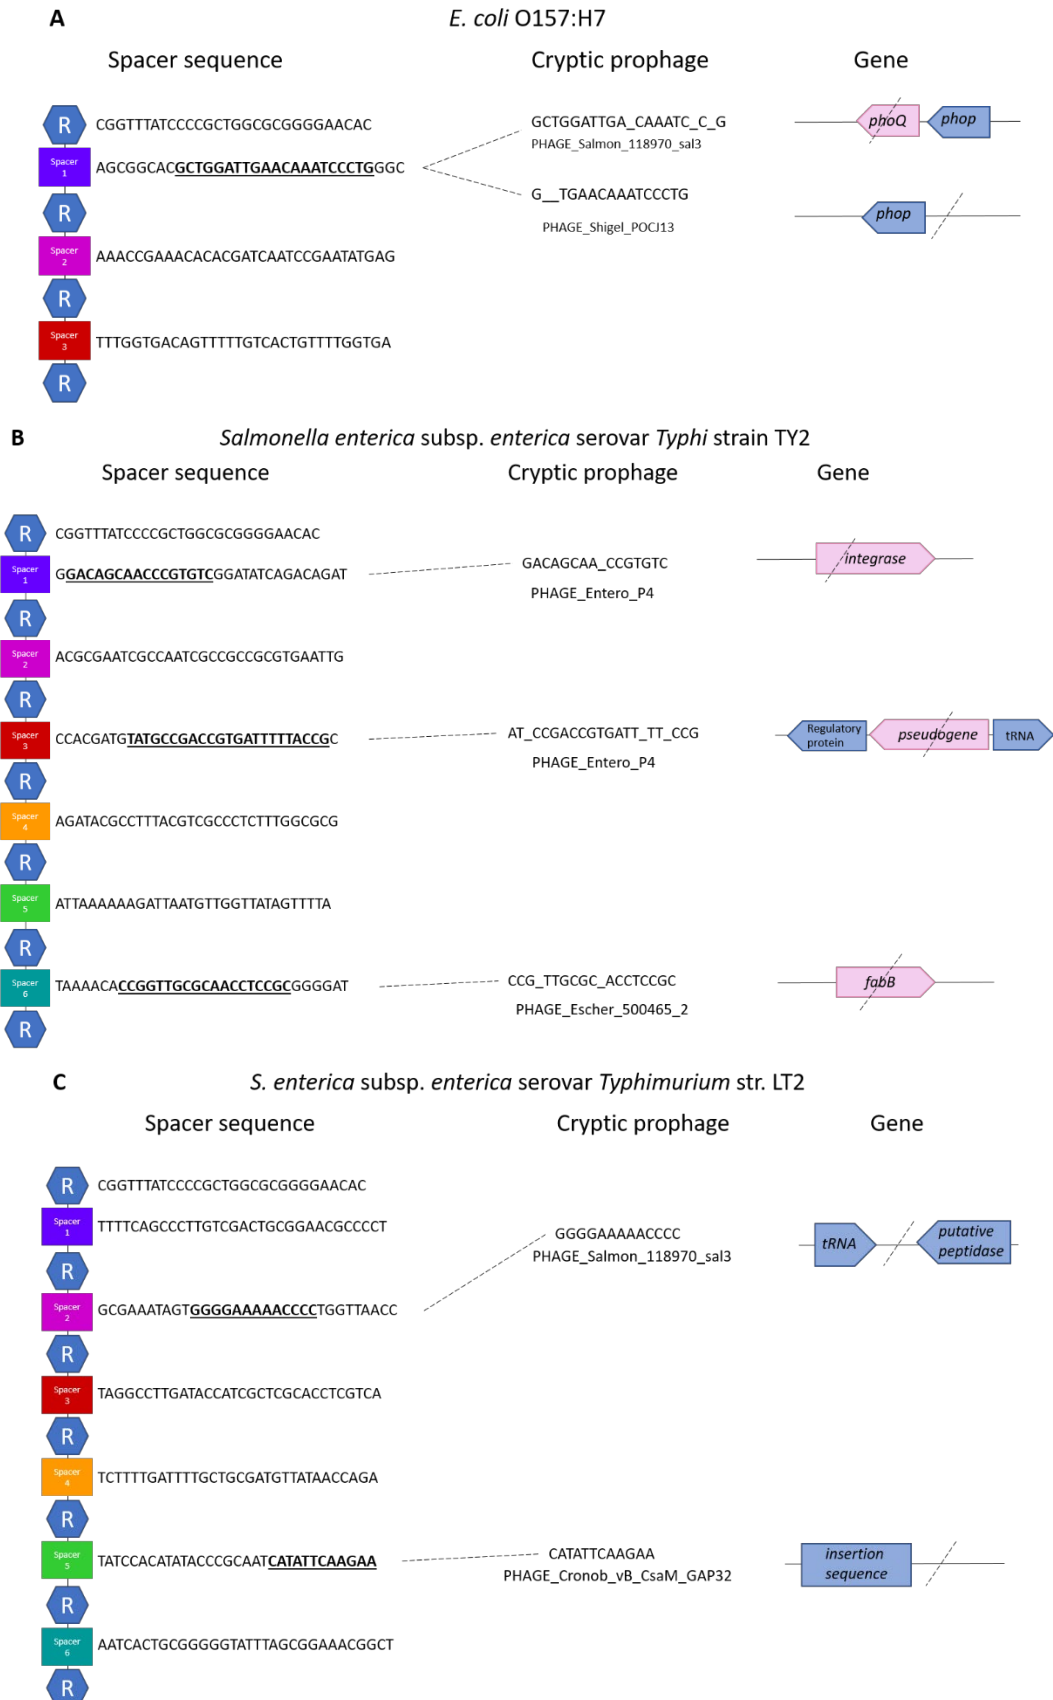

*S. enterica* subsp. *enterica* serovar *Typhimurium* str. LT2

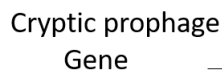

E

*S. enterica* subsp. *enterica* serovar *Typhimurium* str. LT2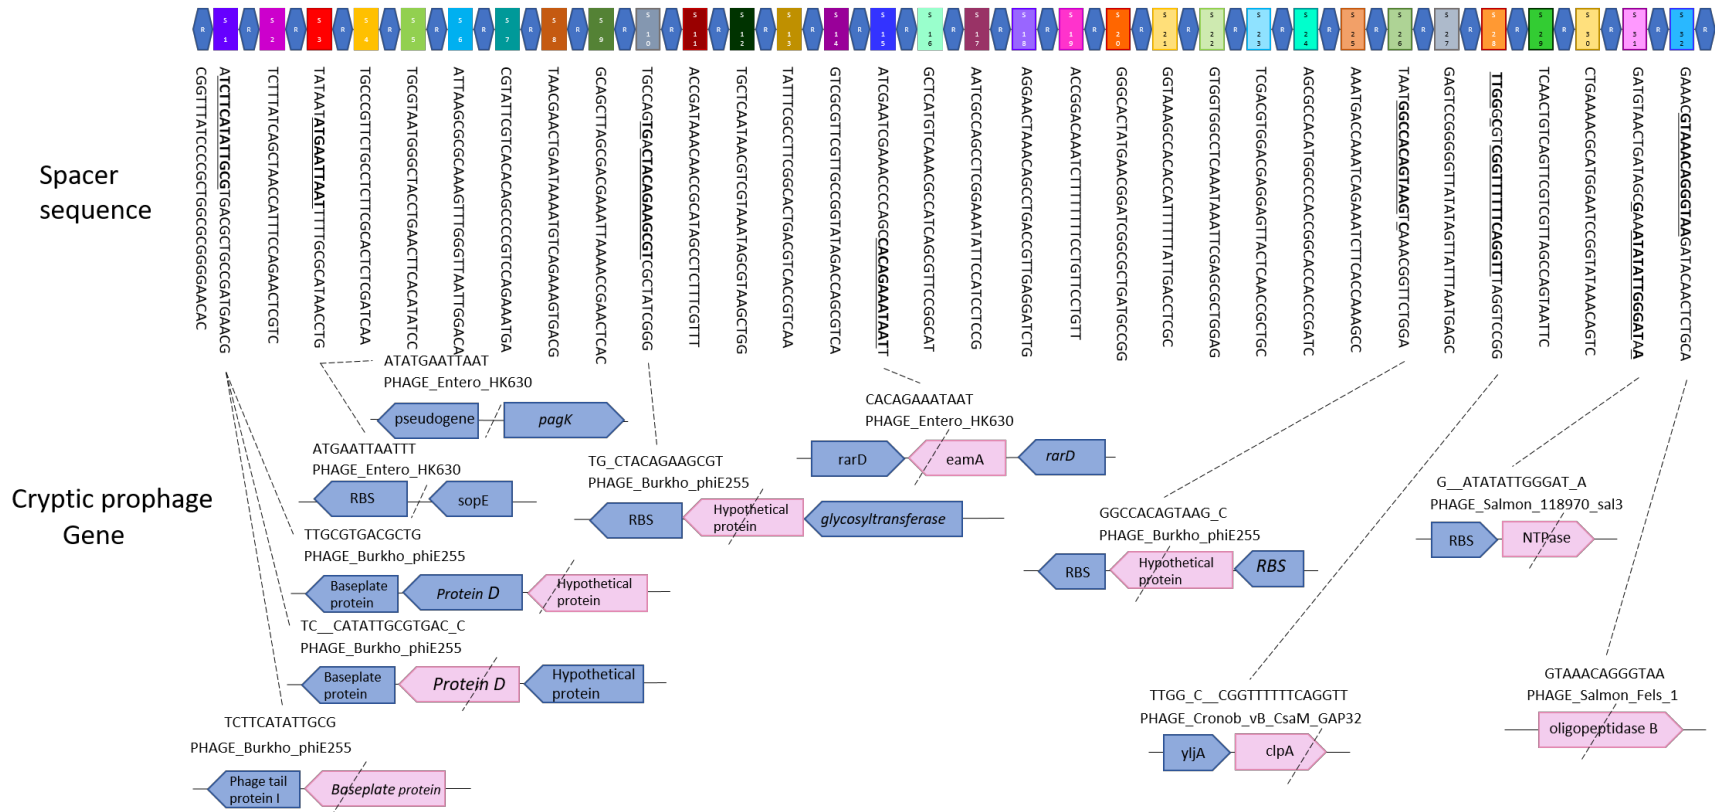

F

*Klebsiella pneumoniae*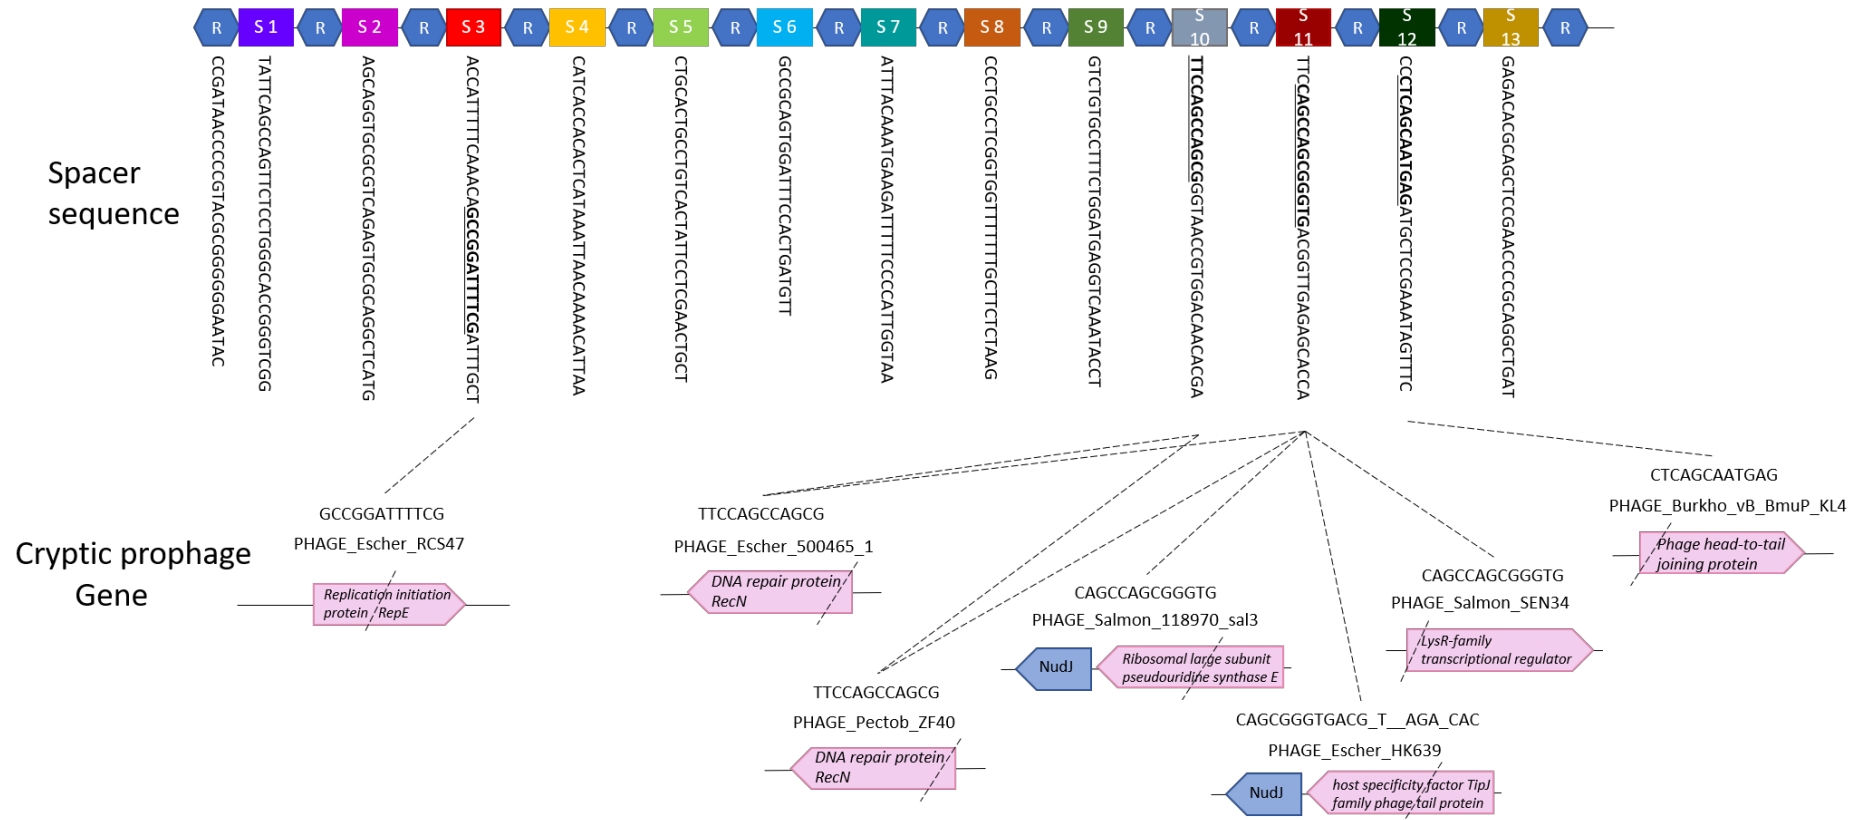

**Supplementary Figure S11. *E. coli* O157:H7 and *Salmonella* spp. CRISPR-Cas spacer sequences related to cryptic prophages.** (A) Repeat (R, blue hexagon) and spacer (rectangle) sequences of each CRISPR-Cas system of *E. coli* O157:H7, *Salmonella* spp., and *K. pneumoniae* indicating matches with their cryptic prophages. (A) *E. coli* O157:H7, (B) *S. enterica* subsp. *enterica* serovar *Typhi* strain TY2, (C, D, E) three CRISPR-Cas systems of *S. enterica* subsp. *enterica* serovar *Typhimurium* str. LT2, and (F) *K. pneumoniae*. Pink highlight and dashed lines positions relative to the cryptic prophage genes.
